# Supplementary material for: The Changes in Stress Coping, Alcohol Use, Cigarette Smoking and Physical Activity during COVID-19 Related Lockdown in Medical Students in Poland
Source: Int J Environ Res Public Health. 2021 Dec 28;19(1):302. doi: 10.3390/ijerph19010302 (PMC8744869; doi:10.3390/ijerph19010302)
Supplement: Supplementary file 1 [file ijerph-19-00302-s001.zip › ijerph-1497003-supplementary.pdf]

## Supplementary Materials

### Questionnaire S1. Coping Orientation to Problems Experienced questionnaire (Mini-COPE).

Charles Carver

#### Mini-COPE

Adaptation: Zygfryd Juczyński, Nina Ogińska-Bulik

..... Age: ..... Sex: M/K Date: .....

People react differently when they encounter difficult or stressful events in their lives. You can deal with stress advise in a variety of ways. The questionnaire is designed to establish how you usually behave when you experience these events. It is understandable that different events trigger different reactions, but what do you usually do when you are experiencing a lot unpleasant event? In each line, mark one answer that suits you best, circling it around the appropriate digit (0-1-2-3). Do not omit any statement.

The individual numbers mean: 0 = "I hardly ever do this", 1 = "I rarely do this", 2 = "I do this often", 3 = "I almost always do this".

**When I am in a very difficult situation, it is usually:**

1. I do work or other activities so as not to think about it. 0 1 2 3
2. My efforts are focused on doing something about the situation. 0 1 2 3
3. I say to myself "that's not true". 0 1 2 3
4. I drink alcohol or take other measures to make me feel better. 0 1 2 3
5. I get emotional support from others. 0 1 2 3
6. I give up trying to achieve the goal. 0 1 2 3
7. I am taking action to improve the situation. 0 1 2 3
8. I don't want to believe this really happened. 0 1 2 3
9. I'm talking about things that help me get away from unpleasant feelings. 0 1 2 3
10. I am looking for advice and help from others on what to do. 0 1 2 3
11. I drink alcohol or take other measures to help me get through this. 0 1 2 3
12. I am trying to see it in a different, more positive light. 0 1 2 3
13. I criticize myself. 0 1 2 3
14. I am trying to develop a strategy or plan defining what to do. 0 1 2 3
15. I receive encouragement and understanding from others. 0 1 2 3

**When I am in a very difficult situation, it is usually:**

16. I give up on dealing with it. 0 1 2 3
17. I am looking for good points in what happened. 0 1 2 3
18. I'm just kidding about this. 0 1 2 3
19. I do something to think less about it, e.g. go to the cinema, watch TV, read, I am daydreaming, sleeping or shopping. 0 1 2 3
20. I accept that this has already happened. 0 1 2 3
21. I reveal my negative emotions. 0 1 2 3
22. I am trying to find solace in religion or in my faith. 0 1 2 3
23. I get help or advice from other people. 0 1 2 3
24. I'm learning to live with it. 0 1 2 3
25. I am seriously wondering what steps should be taken. 0 1 2 3
26. I blame myself for what happened. 0 1 2 3
27. I pray or meditate. 0 1 2 3
28. I treat this situation as playing. 0 1 2 3

## AUDIT questionnaire

**Please circle the answer that is correct for you**

1. How often do you have a drink containing alcohol?

- Never
- Monthly or less
- 2-4 times a month
- 2-3 times a week
- 4 or more times a week

2. How many standard drinks containing alcohol do you have on a typical day when drinking?

- 1 or 2
- 3 or 4
- 5 or 6
- 7 to 9
- 10 or more

3. How often do you have six or more drinks on one occasion?

- Never
- Less than monthly
- Monthly
- Weekly
- Daily or almost daily

4. During the past year, how often have you found that you were not able to stop drinking once you had started?

- Never
- Less than monthly
- Monthly
- Weekly
- Daily or almost daily

5. During the past year, how often have you failed to do what was normally expected of you because of drinking?

- Never
- Less than monthly
- Monthly
- Weekly
- Daily or almost daily

6. During the past year, how often have you needed a drink in the morning to get yourself going after a heavy drinking session?

- Never
- Less than monthly
- Monthly
- Weekly
- Daily or almost daily

7. During the past year, how often have you had a feeling of guilt or remorse after drinking?

- Never
- Less than monthly
- Monthly
- Weekly
- Daily or almost daily

8. During the past year, have you been unable to remember what happened the night before because you had been drinking?

- Never
- Less than monthly
- Monthly
- Weekly
- Daily or almost daily

9. Have you or someone else been injured as a result of your drinking?

- No
- Yes, but not in the past year
- Yes, during the past year

10. Has a relative or friend, doctor or other health worker been concerned about your drinking or suggested you cut down?

- No
- Yes, but not in the past year
- Yes, during the past year

### Scoring the AUDIT

Scores for each question range from 0 to 4, with the first response for each question (eg never) scoring 0, the second (eg less than monthly) scoring 1, the third (eg monthly) scoring 2, the fourth (eg weekly) scoring 3, and the last response (eg. daily or almost daily) scoring 4. For questions 9 and 10, which only have three responses, the scoring is 0, 2 and 4 (from left to right).

A score of 8 or more is associated with harmful or hazardous drinking, a score of 13 or more in women, and 15 or more in men, is likely to indicate alcohol dependence.

**Questionnaire S3.** The Fagerström Test for Nicotine Dependence.

**Segment:**        \_ \_

**Visit Number:**    \_ \_

**Date of Assessment:** (mm/dd/yyyy)        \_ \_ / \_ \_ / \_ \_ \_ \_

**Do you currently smoke cigarettes?**

☐ No

☐ Yes

If "yes," read each question below. For each question, enter the answer choice which best describes your response.

**1. How soon after you wake up do you smoke your first cigarette?**

☐ Within 5 minutes

☐ 31 to 60 minutes

☐ 6 to 30 minutes

☐ After 60 minutes

**2. Do you find it difficult to refrain from smoking in places where it is forbidden (e.g., in church, at the library, in the cinema)?**

☐ No

☐ Yes

**3. Which cigarette would you hate most to give up?**

☐ The first one in the morning

☐ Any other

**4. How many cigarettes per day do you smoke?**

☐ 10 or less

☐ 21 to 30

☐ 11 to 20

☐ 31 or more

**5. Do you smoke more frequently during the first hours after waking than during the rest of the day?**

☐ No

☐ Yes

**6. Do you smoke when you are so ill that you are in bed most of the day?**

☐ No

☐ Yes

**Comments:**

## ***Instructions***

Clinic personnel will follow standard scoring to calculate score based on responses.

**Your score was: (your level of dependence on nicotine is):**      — —

## Evaluation Measures

---

# International Physical Activity Questionnaire - Short Form

### OVERVIEW

- This measure assesses the types of intensity of physical activity and sitting time that people do as part of their daily lives are considered to estimate total physical activity in MET-min/week and time spent sitting.

### SUBSCALES

- None
- Sample items from the scale:
  - » During the last 7 days, on how many days did you do vigorous physical activities like heavy lifting, digging, aerobics, or fast bicycling?

### STEPPING UP THEME(S) & OUTCOME(S)

- Health & Wellness
  - » Youth are physically healthy

### TARGET POPULATION

- Youth 15 years of age and older

### LENGTH & HOW IT IS MEASURED

- 7 items
- Open-ended questions surrounding individuals' last 7-day recall of physical activity
- Self-report, paper-pencil version or orally
- Available in: English and many other languages

### DEVELOPER

- International Physical Activity Questionnaire, 1998

### GOOD TO KNOW

- Used by the Ontario Trillium Foundation
- [Click here for Guidelines for Data Processing and Analysis of the International Physical Activity Questionnaire \(IPAQ\) - Short Form](#)

Discriminant validity

### PSYCHOMETRICS

- Reliability
  - Test-rest reliability indicated good stability
  - High reliability ( $\alpha < .80$ )
- Validity
  - Predictive validity
  - Concurrent validity
  - Convergent validity
  - Criterion validity

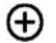

#### LEARN MORE

- International Physical Activity Questionnaire. (2016).Home. Retrieved from <https://sites.google.com/site/theipaq/>
- C.L. Craig, A. Marshall, M. Sjostrom, A. Bauman, M. Booth, B. Ainsworth, *et al.* International PhysicalActivity Questionnaire: 12-country reliability and validity. *Med Sci Sports Exerc*, 35 (2003), pp. 1381-1395
- Lee, P.H., Macfarlane, D.J., Lam, T.H., Stewart, S.M.(2011). *Validity of the international physical activity questionnaire short form (IPAQ-SF): A systematic review.* *International Journal of Behavioral Nutrition and Physical Activity*. 8:115.
- van Poppel MNM, Chinapaw MJM, Mokkink LB, van Mechelen W, Terwee CB: Physical activity questionnaires for adults: A systematic review of measurement properties. *Sports Medicine*. 2010, 40: 565-600. 10.2165/11531930-0000000000- 00000.

(August 2002)

## SHORT LAST 7 DAYS SELF-ADMINISTERED FORMAT

### FOR USE WITH YOUNG AND MIDDLE-AGED ADULTS (15-69 years)

The International Physical Activity Questionnaires (IPAQ) comprises a set of 4 questionnaires. Long (5 activity domains asked independently) and short (4 generic items) versions for use by either telephone or self-administered methods are available. The purpose of the questionnaires is to provide common instruments that can be used to obtain internationally comparable data on health-related physical activity.

#### ***Background on IPAQ***

The development of an international measure for physical activity commenced in Geneva in 1998 and was followed by extensive reliability and validity testing undertaken across 12 countries (14 sites) during 2000. The final results suggest that these measures have acceptable measurement properties for use in many settings and in different languages, and are suitable for national population-based prevalence studies of participation in physical activity.

#### ***Using IPAQ***

Use of the IPAQ instruments for monitoring and research purposes is encouraged. It is recommended that no changes be made to the order or wording of the questions as this will affect the psychometric properties of the instruments.

#### ***Translation from English and Cultural Adaptation***

Translation from English is supported to facilitate worldwide use of IPAQ. Information on the availability of IPAQ in different languages can be obtained at [www.ipaq.ki.se](http://www.ipaq.ki.se). If a new translation is undertaken we highly recommend using the prescribed back translation methods available on the IPAQ website. If possible please consider making your translated version of IPAQ available to others by contributing it to the IPAQ website. Further details on translation and cultural adaptation can be downloaded from the website.

#### ***Further Developments of IPAQ***

International collaboration on IPAQ is on-going and an ***International Physical Activity Prevalence Study*** is in progress. For further information see the IPAQ website.

#### ***More Information***

More detailed information on the IPAQ process and the research methods used in the development of IPAQ instruments is available at [www.ipaq.ki.se](http://www.ipaq.ki.se) and Booth, M.L. (2000). *Assessment of Physical Activity: An International Perspective*. Research Quarterly for Exercise and Sport, 71 (2): s114-20. Other scientific publications and presentations on the use of IPAQ are summarized on the website.

We are interested in finding out about the kinds of physical activities that people do as part of their everyday lives. The questions will ask you about the time you spent being physically active in the **last 7 days**.

Please answer each question even if you do not consider yourself to be an active person. Please think about the activities you do at work, as part of your house and yard work, to get from place to place, and in your sparetime for recreation, exercise or sport.

Think about all the **vigorous** activities that you did in the **last 7 days**. **Vigorous** physical activities refer to activities that take hard physical effort and make you breathe much harder than normal. Think *only* about those physical activities that you did for at least 10 minutes at a time.

1. During the **last 7 days**, on how many days did you do **vigorous** physical activities like heavy lifting, digging, aerobics, or fast bicycling?

\_\_\_\_\_ **days per week**

☐

No vigorous physical activities

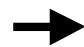

**Skip to question 3**

2. How much time did you usually spend doing **vigorous** physical activities on one of those days?

\_\_\_\_\_ **hours per day**

\_\_\_\_\_ **minutes per day**

☐

Don't know/Not sure

Think about all the **moderate** activities that you did in the **last 7 days**. **Moderate** activities refer to activities that take moderate physical effort and make you breathe somewhat harder than normal. Think *only* about those physical activities that you did for at least 10 minutes at a time.

3. During the **last 7 days**, on how many days did you do **moderate** physical activities like carrying light loads, bicycling at a regular pace, or doubles tennis? Do not include walking.

\_\_\_\_\_ **days per week**

☐

No moderate physical activities

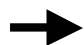

**Skip to question 5**

4. How much time did you usually spend doing **moderate** physical activities on one of those days?

\_\_\_\_\_ hours per day

\_\_\_\_\_ minutes per day

☐

Don't know/Not sure

Think about the time you spent **walking** in the **last 7 days**. This includes at work and at home, walking to travel from place to place, and any other walking that you have done solely for recreation, sport, exercise, or leisure.

5. During the **last 7 days**, on how many days did you **walk** for at least 10 minutes at a time?

\_\_\_\_\_ days per week

☐

No walking

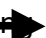

***Skip to question 7***

6. How much time did you usually spend **walking** on one of those days?

\_\_\_\_\_ hours per day

\_\_\_\_\_ minutes per day

☐

Don't know/Not sure

The last question is about the time you spent **sitting** on weekdays during the **last 7 days**. Include time spent at work, at home, while doing course work and during leisure time. This may include time spent sitting at a desk, visiting friends, reading, or sitting or lying down to watch television.

7. During the **last 7 days**, how much time did you spend **sitting** on a **week day**?

\_\_\_\_\_ hours per day

\_\_\_\_\_ minutes per day

☐

Don't know/Not sure

**This is the end of the questionnaire, thank you for participating.**

**Table S1. The results of Kolmogorow-Smirnow's test and Brown-Forsythe's test for strategies of coping with stress.**

| Stage                                  | Stage I |             | Stage II |             | Stage III |             | Brown-Forsythe's test |              |
|----------------------------------------|---------|-------------|----------|-------------|-----------|-------------|-----------------------|--------------|
| Strategy                               | d       | p           | d        | p           | d         | p           | F                     | p            |
| <b>Active stress-coping methods</b>    | 0.21    | <b>0.01</b> | 0.21     | <b>0.01</b> | 0.22      | <b>0.01</b> | 0.73                  | 0.482        |
| <b>Planning</b>                        | 0.21    | <b>0.01</b> | 0.20     | <b>0.01</b> | 0.22      | <b>0.01</b> | 6.44                  | <b>0.002</b> |
| <b>Positive revaluation</b>            | 0.19    | <b>0.01</b> | 0.15     | <b>0.01</b> | 0.17      | <b>0.01</b> | 11.73                 | <b>0.000</b> |
| <b>Acceptance</b>                      | 0.22    | <b>0.01</b> | 0.17     | <b>0.01</b> | 0.16      | <b>0.01</b> | 35.04                 | <b>0.000</b> |
| <b>Sense of humour</b>                 | 0.16    | <b>0.01</b> | 0.17     | <b>0.01</b> | 0.16      | <b>0.01</b> | 9.44                  | <b>0.000</b> |
| <b>Turning to religion</b>             | 0.25    | <b>0.01</b> | 0.25     | <b>0.01</b> | 0.24      | <b>0.01</b> | 2.90                  | 0.055        |
| <b>Seeking emotional support</b>       | 0.19    | <b>0.01</b> | 0.19     | <b>0.01</b> | 0.21      | <b>0.01</b> | 9.56                  | <b>0.000</b> |
| <b>Seeking instrumental support</b>    | 0.18    | <b>0.01</b> | 0.18     | <b>0.01</b> | 0.20      | <b>0.01</b> | 2.89                  | 0.056        |
| <b>Dealing with other things</b>       | 0.19    | <b>0.01</b> | 0.15     | <b>0.01</b> | 0.15      | <b>0.01</b> | 3.06                  | <b>0.047</b> |
| <b>Denial</b>                          | 0.26    | <b>0.01</b> | 0.21     | <b>0.01</b> | 0.22      | <b>0.01</b> | 9.70                  | <b>0.000</b> |
| <b>Giving vent to one's feelings</b>   | 0.17    | <b>0.01</b> | 0.16     | <b>0.01</b> | 0.17      | <b>0.01</b> | 3.63                  | <b>0.027</b> |
| <b>Taking in psychopharmaceuticals</b> | 0.43    | <b>0.01</b> | 0.40     | <b>0.01</b> | 0.38      | <b>0.01</b> | 20.73                 | <b>0.000</b> |
| <b>Doing nothing</b>                   | 0.19    | <b>0.01</b> | 0.17     | <b>0.01</b> | 0.17      | <b>0.01</b> | 21.99                 | <b>0.000</b> |
| <b>Self-blaming</b>                    | 0.16    | <b>0.01</b> | 0.14     | <b>0.01</b> | 0.11      | <b>0.01</b> | 5.27                  | <b>0.005</b> |

Legend: d – “d score” in Kolmogorow-Smirnow's test; F – “F score” in Brown-Forsythe's test; p – significance level

Data were obtained with the Kolmogorow-Smirnow's test and Brown-Forsythe's test.

**Table S2. The results of Kolmogorow-Smirnow's test and Brown-Forsythe's test for types of physical activity.**

| Type of physical activity                  | Stage I |                 | Stage II |                 | Stage III |                 | Brown-Forsythe's test |              |
|--------------------------------------------|---------|-----------------|----------|-----------------|-----------|-----------------|-----------------------|--------------|
|                                            | d       | p               | d        | p               | d         | p               | F                     | p            |
| <b>Vigorous physical activity – Low</b>    | 0.28    | <b>&lt;0.01</b> | 0.41     | <b>&lt;0.01</b> | 0.35      | <b>&lt;0.01</b> | 1.09                  | 0.338        |
| <b>Vigorous physical activity – Medium</b> | 0.18    | <b>&lt;0.05</b> | 0.24     | <b>&lt;0.01</b> | 0.22      | <b>&lt;0.01</b> | 0.75                  | 0.473        |
| <b>Vigorous physical activity – High</b>   | 0.14    | <0.10           | 0.14     | <b>&lt;0.05</b> | 0.17      | <b>&lt;0.05</b> | 4.19                  | <b>0.16</b>  |
| <b>Moderate physical activity – Low</b>    | 0.17    | <b>&lt;0.01</b> | 0.39     | <b>&lt;0.01</b> | 0.25      | <b>&lt;0.01</b> | 0.97                  | 0.378        |
| <b>Moderate physical activity – Medium</b> | 0.13    | <0.10           | 0.29     | <b>&lt;0.01</b> | 0.27      | <b>&lt;0.01</b> | 1.79                  | 0.169        |
| <b>Moderate physical activity – High</b>   | 0.14    | <0.15           | 0.18     | <b>&lt;0.05</b> | 0.18      | <b>&lt;0.05</b> | 7.67                  | <b>0.001</b> |
| <b>Walking – Low</b>                       | 0.14    | <b>&lt;0.01</b> | 0.24     | <b>&lt;0.01</b> | 0.12      | <b>&lt;0.01</b> | 3.93                  | <b>0.020</b> |
| <b>Walking – Medium</b>                    | 0.15    | <b>&lt;0.05</b> | 0.10     | >0.20           | 0.17      | <b>&lt;0.05</b> | 4.24                  | <b>0.015</b> |
| <b>Walking – High</b>                      | 0.16    | <b>&lt;0.05</b> | 0.15     | <b>&lt;0.05</b> | 0.22      | <b>&lt;0.01</b> | 0.97                  | 0.382        |
| <b>Sedentary time – Low</b>                | 0.16    | <b>&lt;0.01</b> | 0.15     | <b>&lt;0.01</b> | 0.29      | <b>&lt;0.01</b> | 7.18                  | <b>0.001</b> |
| <b>Sedentary time – Medium</b>             | 0.26    | <b>&lt;0.01</b> | 0.18     | <b>&lt;0.01</b> | 0.32      | <b>&lt;0.01</b> | 0.96                  | 0.382        |
| <b>Sedentary time – High</b>               | 0.16    | <b>&lt;0.05</b> | 0.15     | <b>&lt;0.05</b> | 0.20      | <b>&lt;0.01</b> | 0.90                  | 0.407        |

Legend: d – “d score” in Kolmogorow-Smirnow's test; F – “F score” in Brown-Forsythe's test; p – significance level

Data were obtained with the Kolmogorow-Smirnow's test and Brown-Forsythe's test.

**Table S3.** Association between coping with stress and progression of COVID-19 pandemic.

| Strategy \ Stage                | Stage  | Stage II  |        | Stage III |       | p <sup>1</sup> |
|---------------------------------|--------|-----------|--------|-----------|-------|----------------|
|                                 | Median | X±SD      | Median | X±SD      |       |                |
| Active stress-coping methods    | 2.00   | 2.15±0.76 | 2.00   | 2.08±0.81 | 0.127 |                |
| Planning                        | 2.00   | 2.04±0.80 | 2.00   | 2.01±0.83 | 0.921 |                |
| Positive re-evaluation          | 1.50   | 1.43±0.86 | 1.50   | 1.47±0.91 | 0.121 |                |
| Acceptance                      | 2.00   | 1.72±0.80 | 2.00   | 1.67±0.82 | 0.479 |                |
| Sense of humour                 | 1.00   | 0.95±0.71 | 1.00   | 0.92±0.73 | 0.507 |                |
| Turning to religion             | 0.50   | 0.92±1.00 | 0.50   | 0.95±1.02 | -     |                |
| Seeking emotional support       | 2.00   | 1.99±0.90 | 2.00   | 1.93±0.93 | 0.257 |                |
| Seeking instrumental support    | 2.00   | 1.88±0.93 | 2.00   | 1.87±0.90 | 0.771 |                |
| Dealing with other things       | 1.50   | 1.56±0.76 | 1.50   | 1.55±0.78 | 0.802 |                |
| Denial                          | 0.50   | 0.68±0.71 | 0.50   | 0.68±0.73 | 0.817 |                |
| Giving vent to one's feelings   | 1.50   | 1.55±0.72 | 1.50   | 1.56±0.77 | -     |                |
| Taking in psychopharmaceuticals | 0.00   | 0.37±0.65 | 0.00   | 0.44±0.71 | 0.114 |                |
| Doing nothing                   | 0.50   | 0.79±0.74 | 0.50   | 0.76±0.74 | -     |                |
| Self-blaming                    | 2.00   | 1.70±0.93 | 1.50   | 1.67±0.95 | 0.732 |                |

Legend: X – average; SD – standard deviation; p – significance level; <sup>1</sup> – values obtained in the Dunn's test.

Data were obtained with the post-hoc Dunn's test.

**Table S4.** The correlations between stress-coping methods with age in the each examined stages of COVID-19 pandemic.

| Correlations                           | Stage I |       | Stage II |              | Stage III |              |
|----------------------------------------|---------|-------|----------|--------------|-----------|--------------|
|                                        | R       | p     | R        | p            | R         | p            |
| <b>Active stress-coping methods</b>    | -0.033  | 0.228 | -0.001   | 0.970        | 0.031     | 0.389        |
| <b>Planning</b>                        | -0.014  | 0.605 | 0.099    | <b>0.004</b> | 0.021     | 0.570        |
| <b>Positive reevaluation</b>           | 0.030   | 0.278 | 0.078    | <b>0.025</b> | 0.055     | 0.129        |
| <b>Acceptance</b>                      | -0.015  | 0.586 | 0.067    | 0.053        | 0.022     | 0.538        |
| <b>Sense of humour</b>                 | -0.020  | 0.474 | -0.046   | 0.186        | -0.030    | 0.406        |
| <b>Turning to religion</b>             | -0.027  | 0.334 | 0.048    | 0.164        | 0.019     | 0.600        |
| <b>Seeking emotional support</b>       | -0.006  | 0.825 | 0.025    | 0.478        | 0.038     | 0.300        |
| <b>Seeking instrumental support</b>    | -0.016  | 0.567 | 0.125    | <b>0.000</b> | 0.026     | 0.476        |
| <b>Dealing with other things</b>       | -0.050  | 0.072 | 0.084    | <b>0.015</b> | 0.077     | <b>0.035</b> |
| <b>Denial</b>                          | 0.024   | 0.388 | -0.008   | 0.828        | -0.000    | 0.995        |
| <b>Giving vent to one's feelings</b>   | -0.043  | 0.118 | 0.074    | <b>0.033</b> | -0.021    | 0.568        |
| <b>Taking in psychopharmaceuticals</b> | 0.010   | 0.704 | -0.026   | 0.459        | 0.042     | 0.246        |
| <b>Doing nothing</b>                   | -0.034  | 0.219 | 0.019    | 0.581        | -0.005    | 0.900        |
| <b>Self-blaming</b>                    | -0.028  | 0.315 | -0.025   | 0.479        | -0.042    | 0.246        |

Legend: R – Spearman's rank correlation coefficient; p – significance level

Data were obtained with the Spearman's rank order test.

**Table S5.** Association between alcohol drinking pattern and progression of COVID-19 pandemic.

| <div>Number of points</div> | Stage | Stage II |     | Stage III |       | $\chi^2$ | OR        | 95% CI           | p      | Bonferroni correction |
|-----------------------------|-------|----------|-----|-----------|-------|----------|-----------|------------------|--------|-----------------------|
|                             | N     | %        | N   | %         |       |          |           |                  |        |                       |
| <8 points                   | 554   | 78.58%   | 470 | 68.71%    | 10.66 | 1.67     | 1.23-2.28 | <b>0.001</b>     | 0.0042 |                       |
| 8-15 points                 | 133   | 18.87%   | 189 | 27.63%    | 32.01 | 2.80     | 1.95-4.02 | <b>&lt;0.000</b> | 0.0042 |                       |
| 16-19 points                | 8     | 1.13%    | 11  | 1.61%     | 4.47  | 2.71     | 1.04-7.04 | 0.346            | 0.0042 |                       |
| >20 points                  | 10    | 1.42%    | 14  | 2.05%     | 5.69  | 2.76     | 1.17-6.53 | 0.017            | 0.0042 |                       |

Legend:  $\chi^2$  – “ $\chi^2$  score” in chi square test; OR – odds ratio; 95% CI – confidence interval; p – significance level

Data were obtained with the chi square test.

**Table S6.** Association between smoking pattern and progression of COVID-19 pandemic.

| Number<br>of points | Stage | Stage II |    | Stage III |        | $\chi^2$ | OR             | 95% CI       | p      | Bonferroni<br>correction |
|---------------------|-------|----------|----|-----------|--------|----------|----------------|--------------|--------|--------------------------|
|                     | N     | %        | N  | %         |        |          |                |              |        |                          |
| 0-4 points          | 54    | 88.52%   | 93 | 94.90%    | 16.46  | 0.49     | 0.34-0.69      | <b>0.000</b> | 0.0056 |                          |
| 5-8 points          | 6     | 9.84%    | 4  | 4.08%     | 0.0015 | 1.26     | 0.35-4.49      | 0.969        | 0.0056 |                          |
| 9-11 points         | 1     | 1.64%    | 1  | 1.02%     | 0.3446 | 0.84     | 0.05-<br>13.46 | 0.557        | 0.0056 |                          |

Legend:  $\chi^2$  – “ $\chi^2$  score” in chi square test; OR – odds ratio; 95% CI – confidence interval; p – significance level

Data were obtained with the chi square test.

**Table S7.** Association between physical activity and progression of COVID-19 pandemic.

| The<br>of effort | Stage     | Stage II |       | Stage III |       | $\chi^2$ | OR   | 95% CI    | p     | Bonferroni<br>correction |
|------------------|-----------|----------|-------|-----------|-------|----------|------|-----------|-------|--------------------------|
|                  | intensity | N        | %     | N         | %     |          |      |           |       |                          |
| Low              |           | 631      | 74.68 | 580       | 76.82 | 1.00     | 0.89 | 0.71-1.12 | 0.318 | 0.0056                   |
| Medium           |           | 108      | 12.78 | 90        | 11.92 | 0.87     | 0.87 | 0.64-1.17 | 0.351 | 0.0056                   |
| High             |           | 106      | 12.54 | 85        | 11.26 | 0.14     | 0.94 | 0.70-1.27 | 0.704 | 0.0056                   |

Legend:  $\chi^2$  – “ $\chi^2$  score” in chi square test; OR – odds ratio; 95% CI – confidence interval; p – significance level

Data were obtained with the chi square test.

**Table S8.** Association between physical activity (broken down by exercise intensity (Low, Medium, High) and type of physical activity) and progression of COVID-19 pandemic.

| “Low”, “Medium” and “High” together               |                                                   |                                                   |                                                       |
|---------------------------------------------------|---------------------------------------------------|---------------------------------------------------|-------------------------------------------------------|
| Vigorous physical activity [MET] – Median         | Moderate physical activity [MET] – Median         | Walking [MET] – Median                            | Sedentary time [MET] – Median                         |
| Stage II – 320, Stage III – 160<br><b>p=0.005</b> | Stage II – 240, Stage III – 160<br><b>p=0.011</b> | Stage II – 693, Stage III – 792<br><b>p=0.001</b> | Stage II – 300, Stage III – 240<br><b>p&lt;0.0001</b> |

| Low                                       |           | p       | Medium                                    |           | p     | High                                      |           | p     |
|-------------------------------------------|-----------|---------|-------------------------------------------|-----------|-------|-------------------------------------------|-----------|-------|
| Vigorous physical activity [MET] – Median |           |         | Vigorous physical activity [MET] – Median |           |       | Vigorous physical activity [MET] – Median |           |       |
| Stage II                                  | Stage III |         | Stage II                                  | Stage III |       | Stage II                                  | Stage III |       |
| 420                                       | 480       | 0.030   | 960                                       | 720       | -     | 2160                                      | 1920      | -     |
| Low                                       |           | p       | Medium                                    |           | p     | High                                      |           | p     |
| Moderate physical activity [MET] – Median |           |         | Moderate physical activity [MET] – Median |           |       | Moderate physical activity [MET] – Median |           |       |
| Stage II                                  | Stage III |         | Stage II                                  | Stage III |       | Stage II                                  | Stage III |       |
| 160                                       | 90        | -       | 280                                       | 240       | 0.527 | 480                                       | 680       | -     |
| Low                                       |           | p       | Medium                                    |           | p     | High                                      |           | p     |
| Walking [MET] – Median                    |           |         | Walking [MET] – Median                    |           |       | Walking [MET] – Median                    |           |       |
| Stage II                                  | Stage III |         | Stage II                                  | Stage III |       | Stage II                                  | Stage III |       |
| 676.5                                     | 693       | 0.005   | 693                                       | 792       | 0.103 | 924                                       | 1386      | -     |
| Low                                       |           | p       | Medium                                    |           | p     | High                                      |           | p     |
| Sedentary time [MET] – Median             |           |         | Sedentary time [MET] – Median             |           |       | Sedentary time [MET] – Median             |           |       |
| Stage II                                  | Stage III |         | Stage II                                  | Stage III |       | Stage II                                  | Stage III |       |
| 300                                       | 240       | <0.0001 | 240                                       | 300       | 0.001 | 300                                       | 300       | 0.055 |

Legend: p – significance level

Data were obtained with the post-hoc Dunn's test.
